# Supplementary material for: Controllable synthesis of hierarchical CuS/ZnS hetero-nanowires as high-performance visible-light photocatalysts
Source: Royal Society of Chemistry journal article supplement (doi:10.1039/c6ra20306j), 2016-01-01
Supplement: c6ra20306j1.pdf [file c6ra20306j1.pdf]

## Supporting Information

### **Controllable synthesis of hierarchical CuS/ZnS hetero-nanowires as high-performance visible-light photocatalyst**

**Caihong Feng,<sup>a,b</sup> Xianpu Meng,<sup>a</sup> Xiaolu Song,<sup>c</sup> Xueting Feng,<sup>a</sup> Yun Zhao,<sup>\*a</sup> and Gao Liu<sup>\*b</sup>**

<sup>a</sup>School of Chemical Engineering and the Environmental, Beijing Institute of Technology, Beijing 100081, China

<sup>b</sup>Lawrence Berkeley National Laboratory, 1 Cyclotron Road, MS 70R108B, Berkeley, California 94720, United States

<sup>c</sup>Fengcheng Field Operation District, Xinjiang Oilfield Company, PetroChina

**\* Corresponding author:** [zhaoyun@bit.edu.cn](mailto:zhaoyun@bit.edu.cn); [gliu@lbl.gov](mailto:gliu@lbl.gov)

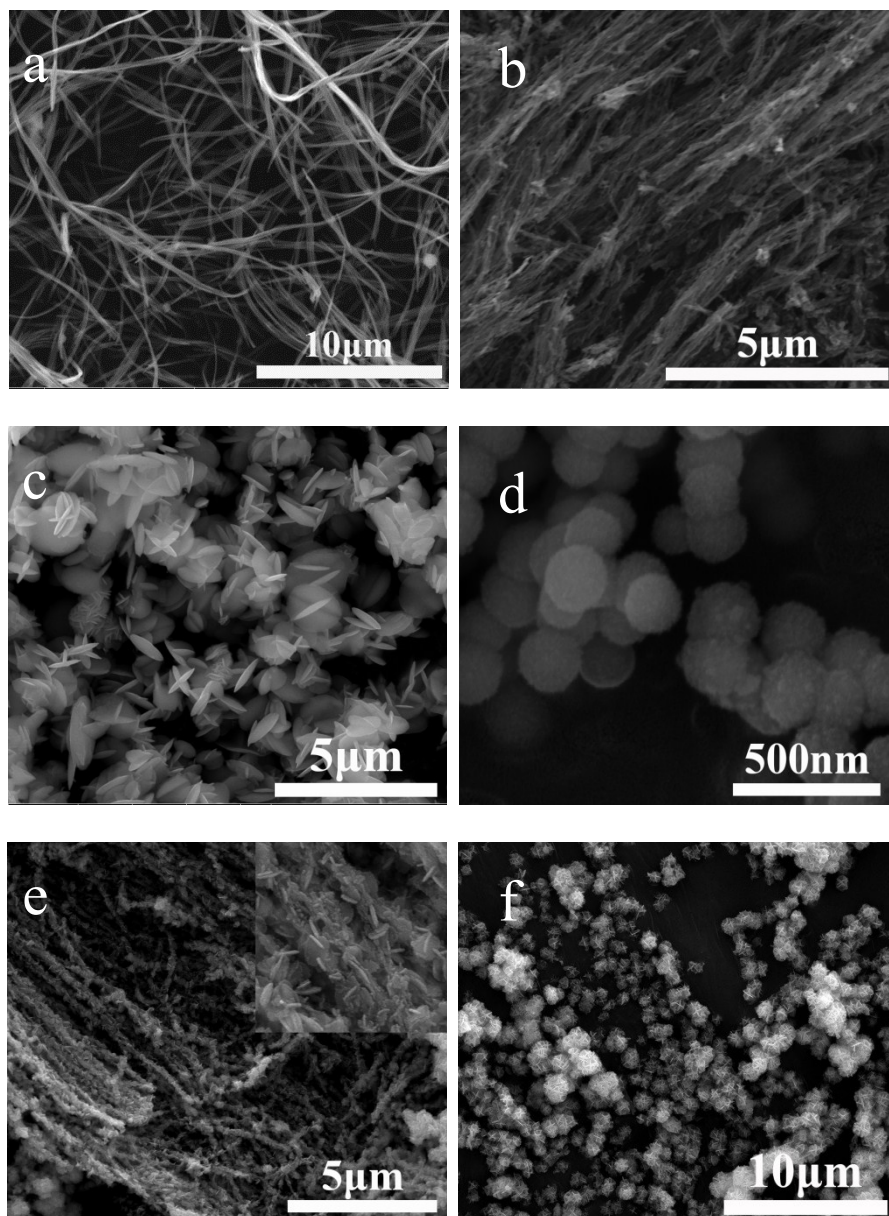

Fig S1. SEM image of the samples (a) precursors, (b) CuS, (c) CuS/ZnS prepared at the condition of adding  $\text{Zn}(\text{NO}_3)_2 \cdot 6\text{H}_2\text{O}$ ,  $\text{Cu}(\text{NO}_3)_2 \cdot 3\text{H}_2\text{O}$  and solvent together, (d) ZnS, (e)  $\text{CZ}_{0.2}$ , (f)  $\text{CZ}_{0.7}$ .

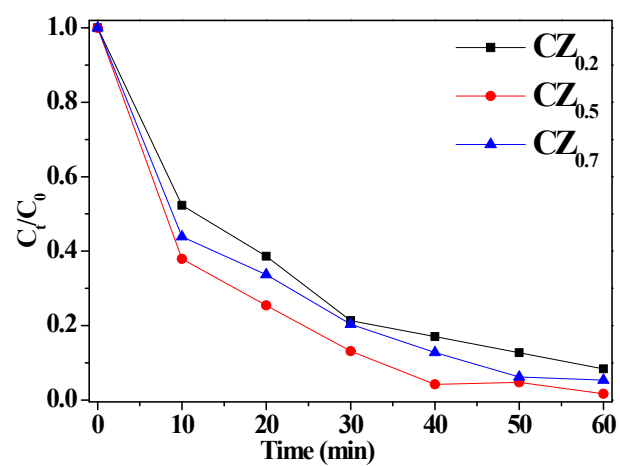

Fig S2. Comparison of photocatalytic efficiency of samples with heterojunctions for the degradation of MB under visible light

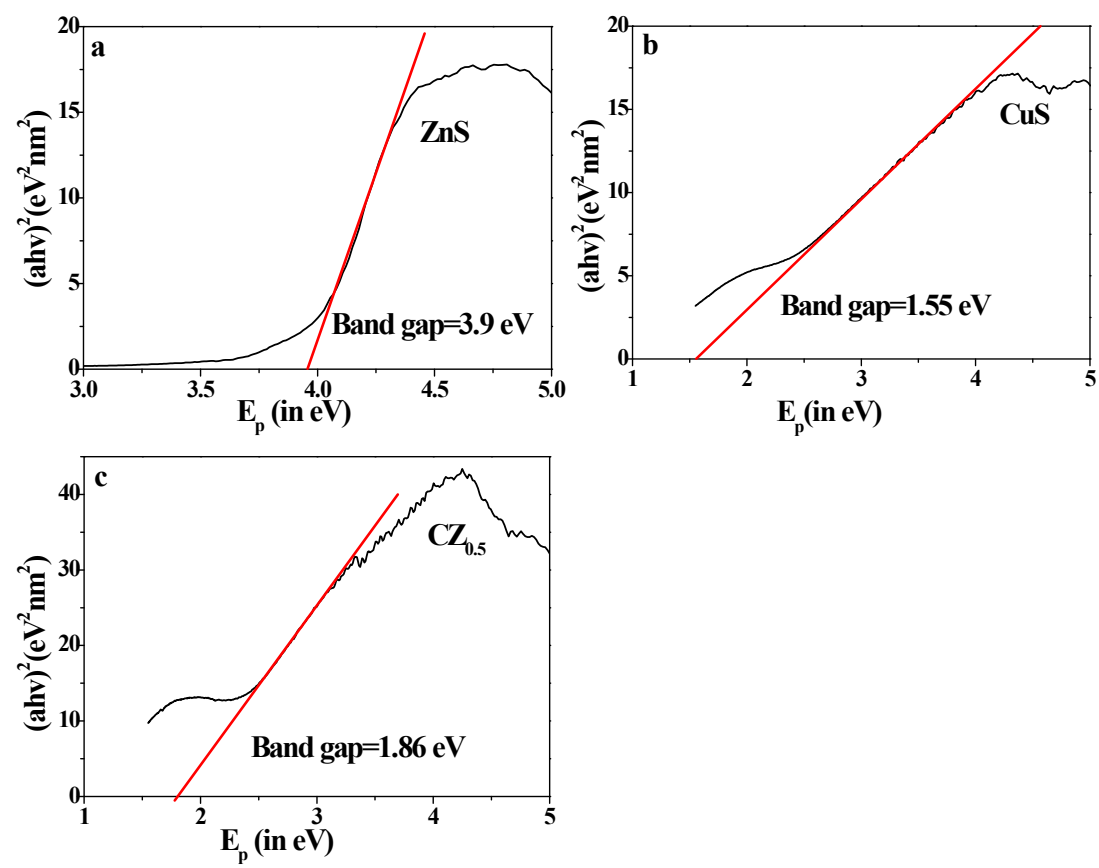

Fig S3. Band gap calculation of (a) ZnS, (b) CuS, (c) CZ<sub>0.5</sub>.
